# Supplementary material for: Black carbon content of traffic emissions impacts significantly on black carbon mass size distributions and mixing states
Source: Copernicus journal article supplement (doi:10.5194/egusphere-2023-351), 2023-03-27
Supplement: Supplementary file 1 [file egusphere-2023-351-supplement.pdf]

1 **Black carbon content of traffic emissions impacts significantly on black carbon**  
2 **mass size distributions and mixing states**

3 **Fei Li<sup>1,3,5#</sup>, Biao Luo<sup>2,4#</sup>, Miaomiao Zhai<sup>2,4</sup>, Li Liu<sup>3</sup>, Gang Zhao<sup>7</sup>, Hanbing Xu<sup>6</sup>, Tao Deng<sup>3</sup>,**  
4 **Xuejiao Deng<sup>3</sup>, Haobo Tan<sup>3</sup>, Ye Kuang<sup>2,4\*</sup>, Jun Zhao<sup>1\*</sup>**

5 <sup>1</sup> School of Atmospheric Sciences, Guangdong Province Key Laboratory for Climate Change and  
6 Natural Disaster Studies, and Southern Marine Science and Engineering Guangdong Laboratory  
7 (Zhuhai), Sun Yat-sen University, Zhuhai, 519082, China

8 <sup>2</sup> Institute for Environmental and Climate Research, Jinan University, Guangzhou, 511443, China.

9 <sup>3</sup> Institute of Tropical and Marine Meteorology, China Meteorological Administration, Guangzhou,  
10 510640, China

11 <sup>4</sup> Guangdong-Hongkong-Macau Joint Laboratory of Collaborative Innovation for Environmental  
12 Quality, Guangzhou, 511443, China.

13 <sup>5</sup> Xiamen Key Laboratory of Straits Meteorology, Xiamen Meteorological Bureau, Xiamen, 361012,  
14 China

15 <sup>6</sup> Experimental Teaching Center, Sun Yat-Sen University, Guangzhou 510275, China

16 <sup>7</sup> State Key Joint Laboratory of Environmental Simulation and Pollution Control, International Joint  
17 Laboratory for Regional Pollution Control, Ministry of Education, College of Environmental Sciences  
18 and Engineering, Peking University, Beijing, 100871, China

19

20 # These authors contribute equally to this paper.

21

22 Corresponding author: Ye Kuang ([kuangye@jnu.edu.cn](mailto:kuangye@jnu.edu.cn)) and Jun Zhao

23 ([zhaojun23@mail.sysu.edu.cn](mailto:zhaojun23@mail.sysu.edu.cn))

24

25

26

27 **1. Particle number size distributions inverted from DMA-SP2 measurements and multiple**  
28 **charging corrections**

29 The aerosol number concentrations at mobility diameter  $D_p$  measured by the SP2 represent the  
30 number concentration of aerosols in a diameter range with half width of the electrical mobility as  
31  $\Delta Z_p = Z_p \frac{Q_a}{Q_{sh}}$ , where  $Z_p$  is the electrical mobility corresponding to  $D_p$ ,  $Q_a$  is the SP2 sample flow  
32 (0.1 L/min) and  $Q_{sh}$  is the DMA sheath flow (2 L/min). Therefore, if we term the measured aerosol  
33 number concentration as  $\Delta N(D_p)$ , the corresponding  $\Delta \log(D_p)$  can be calculated based on  $\Delta Z_p$ ,  
34 with the relationship between  $Z_p$  and  $D_p$  as  $Z_p = \frac{neC(D_p)}{3\pi\mu D_p}$ , where  $e$  is the elementary charge,  $\mu$  is the  
35 gas viscosity coefficient, and  $C(D_p)$  is the Cunningham slip correction factor.

36 The size distributions with only transmission efficiency of single charge particles accounted for  
37 can be formulated as:

38 
$$\frac{dN(D_p)}{d\log(D_p)} = \frac{\Delta N(D_p)}{\Delta \log(D_p)} / R,$$

39 where  $R$  is the known transfer efficiency ratio of mobility diameter. Then, multiple charging  
40 correction of one-dimensional size distribution can be conducted as described in Zhao et al. (2021).

41 One the basis of this, the particle number size distributions (PNSD) of BC-free aerosols and BC-  
42 containing aerosols are also be derived. Following Zhao et al. (2021), multiple charging corrections  
43 were conducted separately for BC-containing and BC-free aerosols. The distribution of BC-  
44 containing aerosols could be described using a two-variable function  $\frac{\partial N}{\partial \log(D_p) \partial \log(D_c)}$ , where  $D_c$  is  
45 the BC core diameter. The  $D_c$  was divided into 30 different bins from 80 to 500 nm, where the  $\Delta \log$   
46  $D_c$  was the same for different bins. For each  $D_c$  bin, there was only  $D_p$  dimension for the size  
47 distribution, therefore, the multiple charging correction can be applied.

48 **2. PMF analysis**

49 An improved source apportionment technique called Multilinear Engine (ME-2) were used to  
50 deconvolve organic aerosol (OA) spectra measured by the Q-ACSM into OA factors. Different from  
51 traditional PMF, ME-2 offers a coefficient called a-value to constrain the spectral variation extent of  
52 OA factor with given priori mass spectra. The unconstrained runs with PMF technique were firstly  
53 performed with a possible factor number of 2-8, and diagnostics analysis were shown in Fig.S1, and  
54 the three factors solution seems the best solution, and the spectral and time series analysis of factors

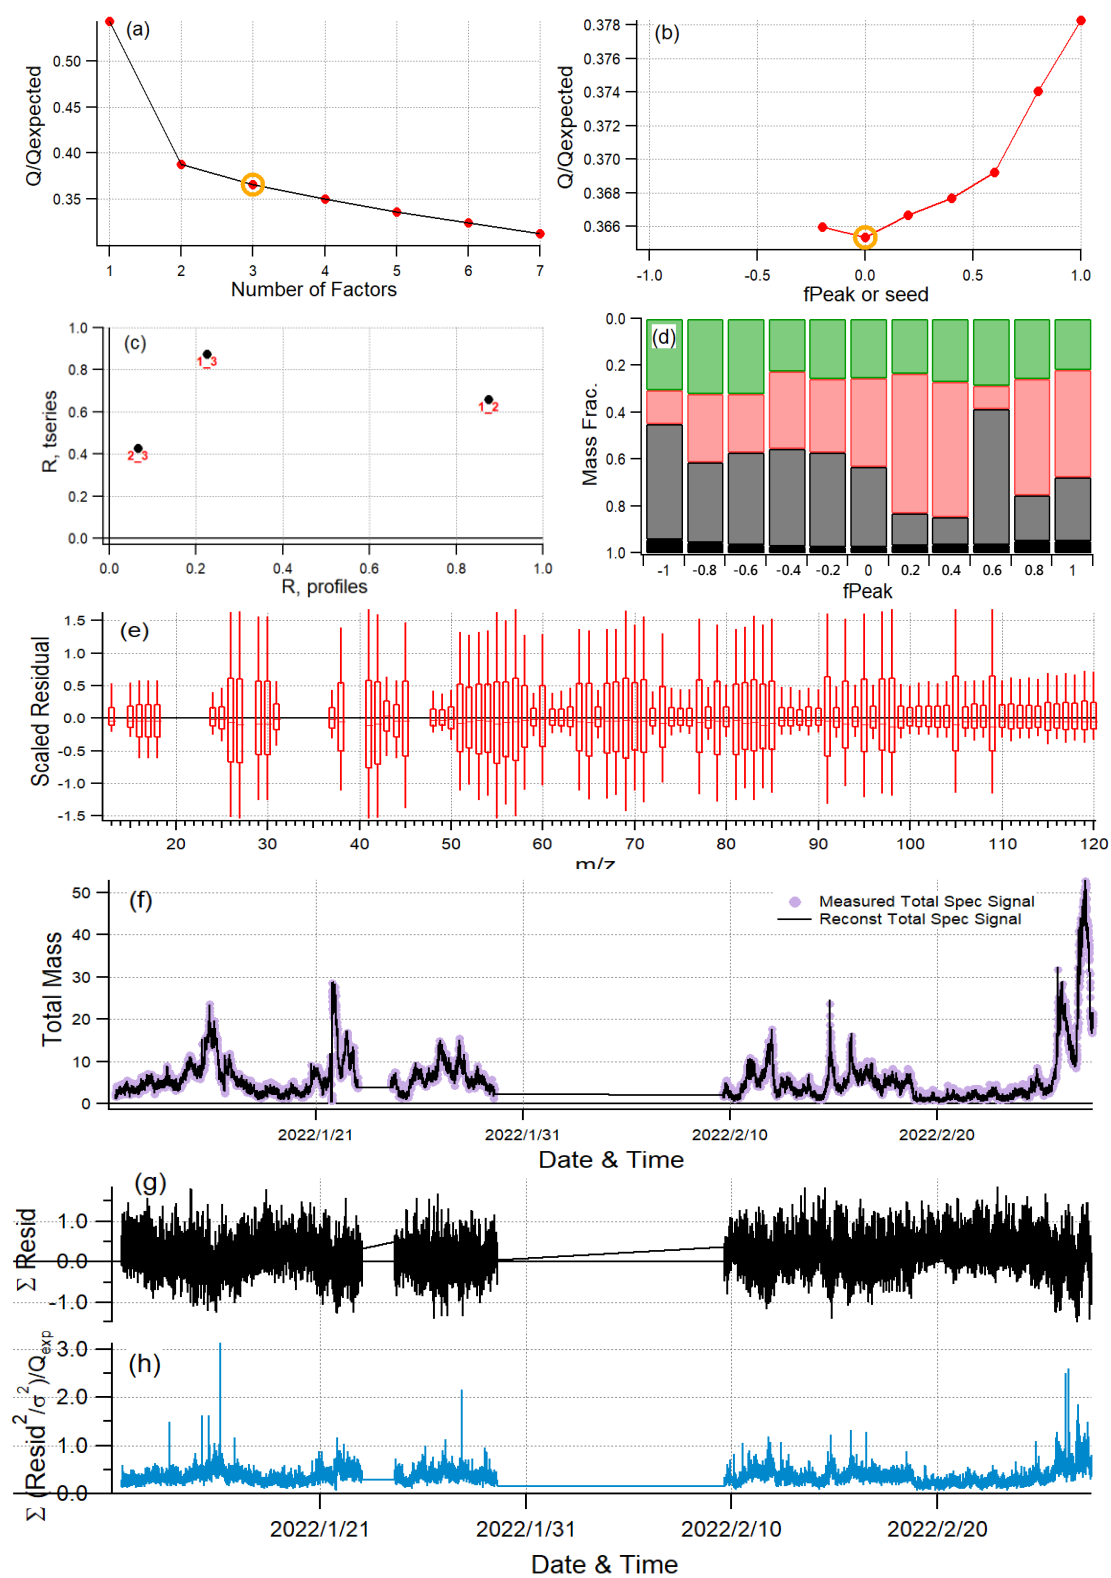

**Figure S1.** Diagnostic plots of the 3-factor solution in the unconstrained PMF.

55 are shown in Fig. S2. It shows clearly a primary organic aerosol factor (POA), a less-oxidized  
 56 oxygenated organic aerosol factor (OOA) and a more-oxidized oxygenated organic aerosol factor  
 57 (MOOA). However, three factor solution does not split two major primary OA factors of cooking-

58 like OA (COA) and hydrocarbon-like OA (HOA) in urban area. Therefore, we had chosen 4 factors  
 59 for ME-2 analysis and constrained the COA profile with the  $a$  value ranging from 0.1 to 0.5. The

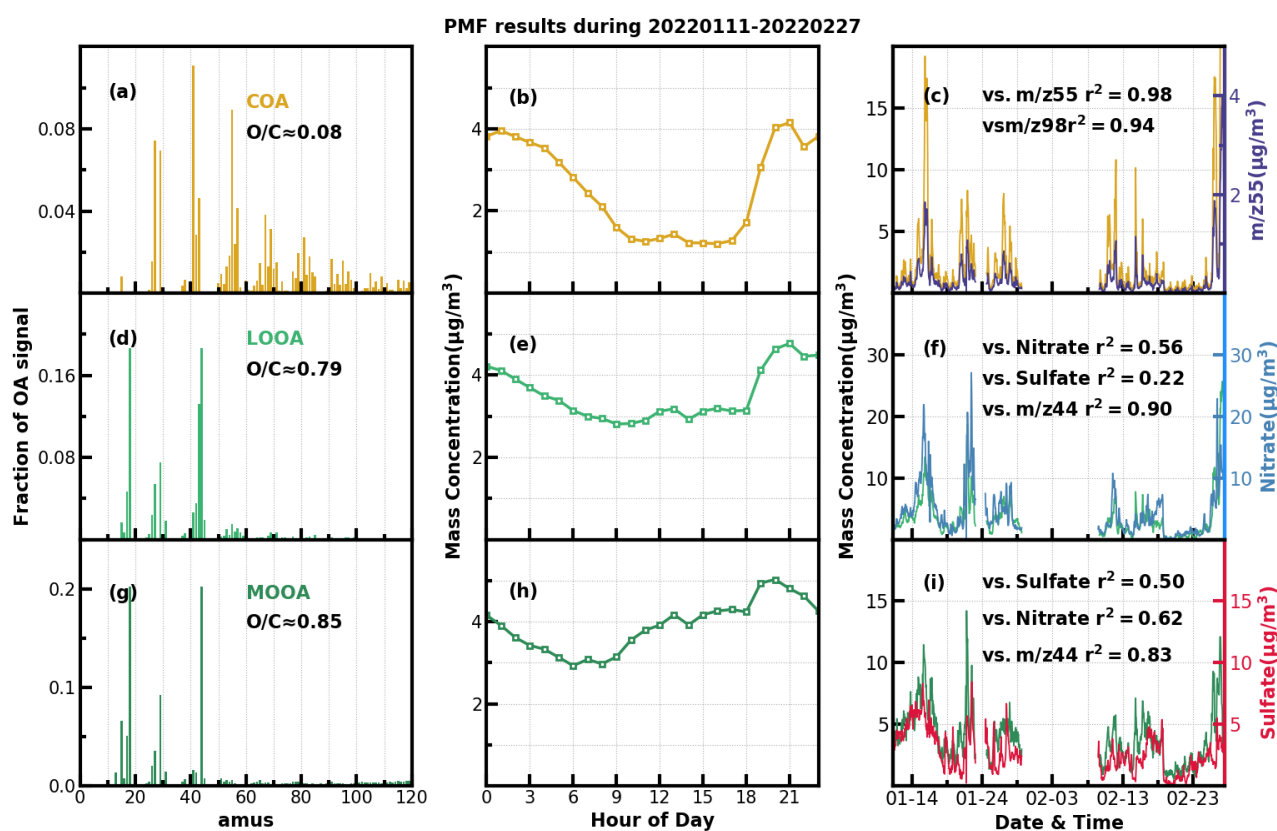

60 Figure S2. The spectral characteristics, diurnal variations and time series analysis of three factors resolved by the PMF  
 61 COA profile reported in Liu et al. (2022) as a proxy was used considering the following three  
 62 reasons: (1) The used instrument of this study is the same one of Liu et al. (2022); (2) the COA  
 63 profile reported in Liu et al. (2022) was determined during the period when both COVID-19 silence-  
 64 action and festival spring occurred when cooking activities grew and traffic activities almost  
 65 vanished thus COA shall dominated over HOA. More details regarding the method can be referred to  
 66 Liu et al. (2022); (3) Resolved variations of HOA and COA are well explained by external datasets  
 67 such as correlations of HOA with black carbon whose correlation coefficient could reach 0.88. The  
 68 four-factor solution using the ME-2 technique with  $a=0.1$  was obtained and was shown in Fig. S3.

68  
 69  
 70  
 71

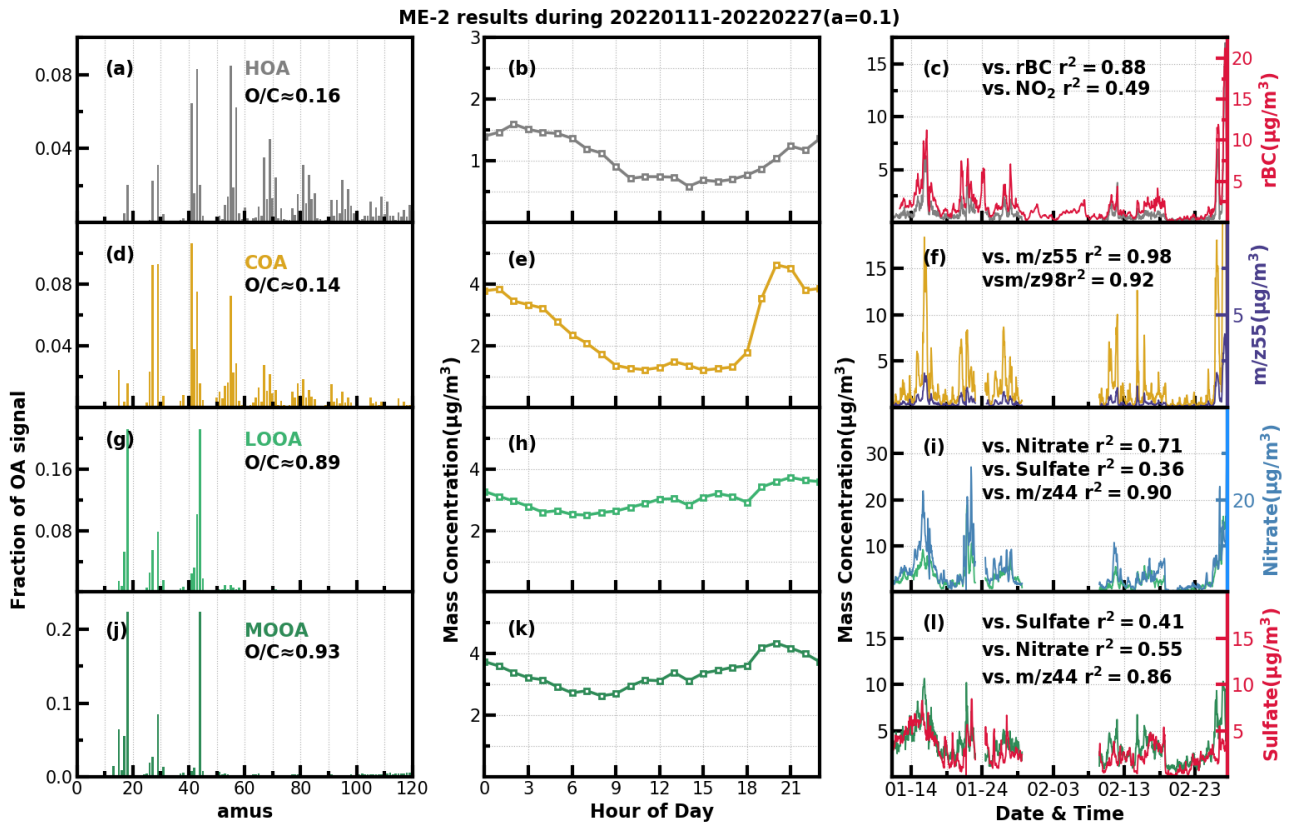

**Figure S3.** Mass spectral profiles, diurnal cycles and correlations with external data of COA(a-c), HOA(d-f), LOOA(g-i) and MOOA(j-l) from ME2-ACSM analysis.

72

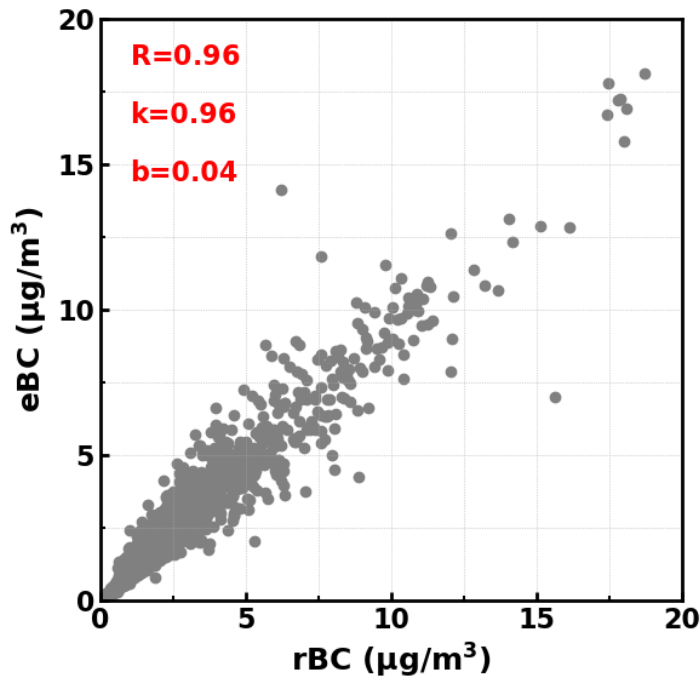

**Figure S4.** Comparison between rBC derived from DMA-SP2 measurements and optical equivalent BC (eBC) derived from AE33 measurements.

73 **Fitting form of BCMSD:**

74 
$$\frac{dM_{BC}}{d\log D_p} = \frac{M_{BC}}{\sqrt{2\pi} \log(\sigma_g)} \cdot \exp\left(-\frac{[\log(D_p) - \log(D_{g,BC})]^2}{2 \log(\sigma_g)^2}\right) \quad (1)$$

75

76 **References**

77 Liu, L., Kuang, Y., Zhai, M., Xue, B., He, Y., Tao, J., Luo, B., Xu, W., Tao, J., Yin, C., Li, F., Xu, H., Deng, T., Deng, X., Tan, H., and  
78 Shao, M.: Strong light scattering of highly oxygenated organic aerosols impacts significantly on visibility degradation,  
79 *Atmos. Chem. Phys.*, 22, 7713-7726, 10.5194/acp-22-7713-2022, 2022.

80 Zhao, G., Tan, T., Zhu, Y., Hu, M., and Zhao, C.: Method to quantify black carbon aerosol light absorption enhancement  
81 with a mixing state index, *Atmos. Chem. Phys.*, 21, 18055-18063, 10.5194/acp-21-18055-2021, 2021.

82
